# Supplementary material
Source: PubMed Central journal article supplement (PMC5153967)

**A**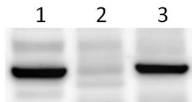

- 1- Human osteosarcoma cell line (143B)
- 2- 143B cell line + blocking peptide
- 3- Canine osteosarcoma cell line (K003)

**B**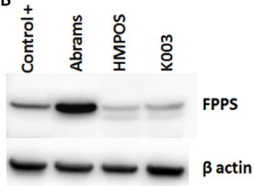

Supplement: JVIM-30-1187-s001.pdf [file JVIM-30-1187-s001.pdf]

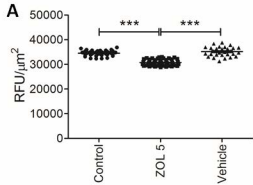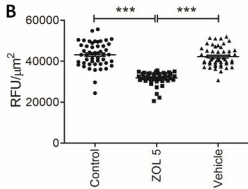

Supplement: JVIM-30-1187-s002.pdf [file JVIM-30-1187-s002.pdf]
